# Supplementary material for: The Proteasome System in Infection: Impact of β5 and LMP7 on Composition, Maturation and Quantity of Active Proteasome Complexes
Source: PubMed Central journal article supplement (PMC3387237; doi:10.1371/journal.pone.0039827), 2012-06-29
Supplement: pone.0039827.s001.pdf [file pone.0039827.s001.pdf]

FIGURE S1

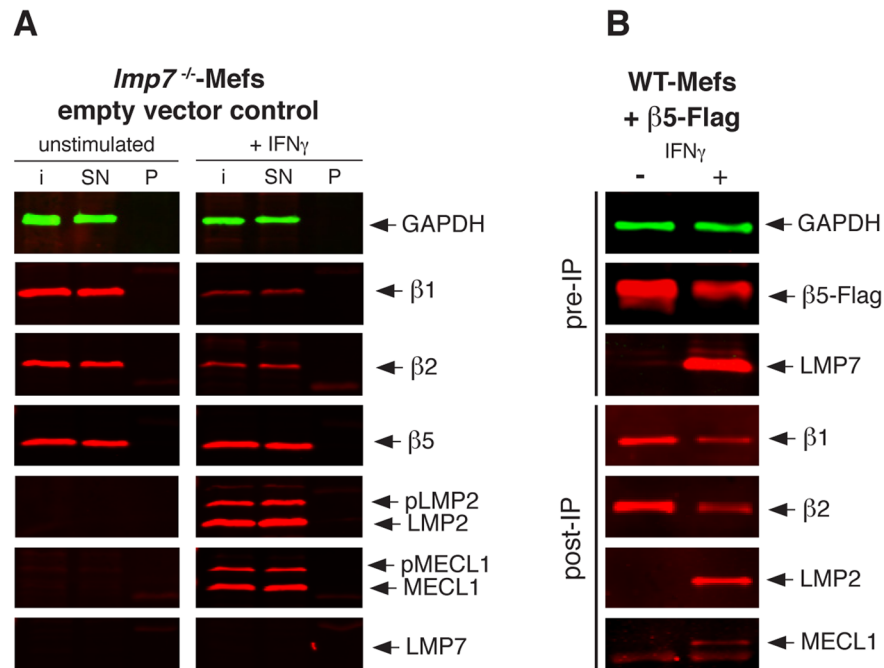

**Figure S1: Co-immunoprecipitation analysis in *Imp7*<sup>-/-</sup> Mefs transduced with the empty vector construct and in WT-MEFs overexpressing  $\beta$ 5**

(A) *Imp7*<sup>-/-</sup> Mefs were transduced with the empty vector, which was used for retroviral transduction of the *Imp7*<sup>-/-</sup> Mefs expressing LMP7-Flag and proLMP7 $\beta$ 5-Flag or the pro $\beta$ 5-containing subunits  $\beta$ 5-Flag and pro $\beta$ 5LMP7-Flag (Figure 1A). The *Imp7*<sup>-/-</sup> Mef with the empty vector were either left unstimulated or cultured in the presence of 50 U/ml IFN $\gamma$  for 4 days, which was followed by co-immunoprecipitation analysis to control that the precipitation shown in Figure 1 was specific for Flag-tagged proteasome complexes. Two-colour fluorescent immunoblot analysis confirmed that the precipitates (P) were negative for  $\beta$ 1,  $\beta$ 2,  $\beta$ 5, LMP2, MECL-1 and LMP7, and that all non-Flag-tagged proteasome from the input material (i) were recovered in the supernatants (SN). (B) WT-Mefs were retrovirally transduced to overexpress Flag-tagged, full-length  $\beta$ 5 ( $\beta$ 5-Flag). WT-Mefs +  $\beta$ 5-Flag were either left untreated or cultured in the presence of 50 U/ml IFN $\gamma$  for 4 days, which was followed by co-immunoprecipitation analysis. The abundance of GAPDH,  $\beta$ 5-Flag and LMP7 was checked in the input material (pre-IP) and the abundance of  $\beta$ 1,  $\beta$ 2, LMP2 and MECL-1 in the precipitate (post-IP).
