# Supplementary material for: The Proteasome System in Infection: Impact of β5 and LMP7 on Composition, Maturation and Quantity of Active Proteasome Complexes
Source: PubMed Central journal article supplement (PMC3387237; doi:10.1371/journal.pone.0039827), 2012-06-29
Supplement: pone.0039827.s003.pdf [file pone.0039827.s003.pdf]

**FIGURE S3**

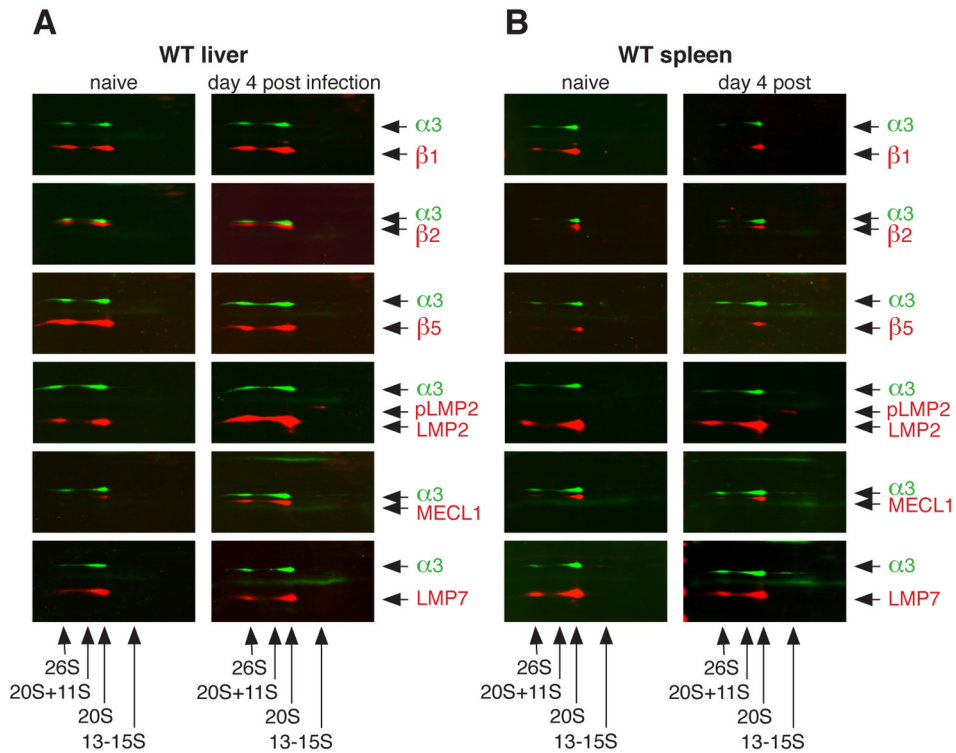

**Figure S3: Analysis of proteasome composition in naive and listeria-infected WT mice**

Organ lysates of liver (A) and spleen (B) of naive and infected WT mice were analysed by 2D two-colour fluorescent immunoblot analysis. The mice were infected i.v. with  $5 \times 10^3$  cfu *L. monocytogenes* and sacrificed 4 days post-infection. Organs of three to four mice per group were pooled for the analysis. The different proteasome complexes present in the tissues were first separated by Blue Native-PAGE and subsequently by SDS-PAGE followed by Two-colour fluorescent immunoblot analysis. Each membrane was stained for proteasome subunit  $\alpha 3$  (green signal) and as it is present in all early to mature complexes in proteasome assembly,  $\alpha 3$  serves as a marker for the presence and positions of 13-15S precursor proteasomes, 20S proteasomes and 20S proteasomes + 11S and 19S regulators complexes. Further, membranes were stained for the indicated catalytic  $\beta$  subunits (red signals) to identify, in which of the indicated proteasome complexes they were integrated.
