# Supplementary material for: The Proteasome System in Infection: Impact of β5 and LMP7 on Composition, Maturation and Quantity of Active Proteasome Complexes
Source: PubMed Central journal article supplement (PMC3387237; doi:10.1371/journal.pone.0039827), 2012-06-29
Supplement: pone.0039827.s007.pdf [file pone.0039827.s007.pdf]

**Table S1: Primer sequences used for qPCR and molecular cloning**

| primer         | sequence (5' to 3')*                                               |
|----------------|--------------------------------------------------------------------|
| β1-for         | TGACCAAGGACGAATGTCTG                                               |
| β1-rev         | GATTTGGTCTCCCAAAGCA                                                |
| β2-for         | CTGTCTTGGAAGCGGATTTC                                               |
| β2-rev         | GCAACAACCATCCCTTCAGT                                               |
| β5-for         | GTGAATCAGCACGGGTTTT                                                |
| β5-rev         | AATCCGCTGCAACAATGACT                                               |
| LMP2-for       | CATCATGGCAGTGGAGTTTGAC                                             |
| LMP2-rev       | ACCTGAGAGGGCACAGAAGATG                                             |
| MECL-1-for     | CAGCCAAACATGACGCTGG                                                |
| MECL-1-rev     | CAGTGATCACACAGGCATCCAC                                             |
| LMP7-for       | ACCACACTCGCCTTCAAGTTC                                              |
| LMP7-rev       | GCCAAGCAGGTAAGGGTAAATC                                             |
| POMP-for       | AACATCCAGGGTCTGTTTGC                                               |
| POMP-rev       | TCGTTGCCCTCAAATATC                                                 |
| α3-for         | TGCCATGAAGGCTGTGGAAAACA                                            |
| α3-rev         | ACGAGCATCTGCCAGCAAACC                                              |
| α4-for         | CGGAGAGGCGCAACATCCAC                                               |
| α4-rev         | TGTTATGCCTGCCACGCTGC                                               |
| RPS9-for       | CTGGACGAGGGCAAGATGAAGC                                             |
| RPS9-rev       | TGACGTTGGCGGATGAGCACA                                              |
| β5-start-for   | AAAAAGCAGGCTCCACCATGGCGCTGGCTAGCGTG                                |
| β5-Flag-rev    | AGAAAGCTGGGTCTCAGATCTTATCGTCGTCATCCTTG-<br>TAATCGGGGACAGATACTACTAC |
| mβ5-for        | ACCACCACCCTGGCCTTC                                                 |
| proβ5-rev      | TCCGTGAAGCATTTCGATTC                                               |
| LMP7-start-for | AAAAAGCAGGCTCCACCATGGCGTACTGGATCTGTG                               |
| LMP7-Flag-rev  | AGAAAGCTGGGTCTCAGATCTTATCGTCGTCATCCTTG-<br>TAATCCAGAGCGGCCTCTCCG   |
| mLMP7-for      | ACAACCACACTCGCCTTCAAG                                              |
| proLMP7-rev    | GCCGTGGGCCATCTCAAT                                                 |
| attB1-for      | GGGGACAAGTTTGTACAAAAAAGCAGGCT                                      |
| attB2-rev      | GGGGACCACTTTGTACAAGAAAGCTGGGT                                      |
| IRES-eGFP-for  | GGGGACAGCTTTCTTGTACAAAGTGGTCAGCTTCGAATTCTGCAGTCG                   |
| IRES-eGFP-rev  | GGGGACAACCTTTGTATAATAAAGTTGCTTACTTGTACAGCTCGTCCATGC                |
| EF1a-for-B4    | GGGGACAACCTTTGTATAGAAAAGTTGCATGGCTCCGGTG<br>CCCGTCAGTGG            |
| EF1a-rev-B1    | GGGGACTGCTTTTTTGTACAACTTGAACCTGAAATGG<br>AAGAAAAAAA                |

\*All primers were obtained from TIB Molbiol, Berlin, Germany.
